# Supplementary material for: Screening for the Active Anti-Inflammatory and Antioxidant Polyphenols of Gaultheria procumbens and Their Application for Standardisation: From Identification through Cellular Studies to Quantitative Determination
Source: MDPI journal article supplement (doi:10.3390/ijms222111532), 2021-10-26
Supplement: s1 [file s1]

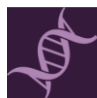

Article

# Screening for the Active Anti-Inflammatory and Antioxidant Polyphenols of *Gaultheria procumbens* and their Application for Standardisation: From Identification, through Cellular Studies to Quantitative Determination

Monika Anna Olszewska <sup>1</sup>, Aleksandra Owczarek <sup>1</sup>, Anna Magiera <sup>1</sup>, Sebastian Granica <sup>2</sup>, and Piotr Michel <sup>1,\*</sup>

<sup>1</sup> Department of Pharmacognosy, Faculty of Pharmacy, Medical University of Lodz, Muszynskiego 1 St., 90-151 Lodz, Poland

<sup>2</sup> Microbiota Lab, Centre for Preclinical Studies, Department of Pharmacognosy and Molecular Basis of Phytotherapy, Medical University of Warsaw, 1 Banacha St., 02-097 Warsaw, Poland

\* Correspondence: piotr.michel@umed.lodz.pl (P. Michel); Tel.: +48-426779169

## Supplementary Materials

**Table S1.** Phenolic analytes detected in *G. procumbens* aerial part dry extract by UHPLC-PDA-ESI-MS<sup>3</sup>.

**Figure S1.** Proposed fragmentation scheme of cinnamtannin B-1 (CB1) in LC-ESI-MS<sup>3</sup>.

**Table S2.** NMR spectral data of cinnamtannin B-1 (CB1) in methanol-*d*<sub>4</sub> (600 MHz for <sup>1</sup>H NMR and 150.9 MHz for <sup>13</sup>C NMR).

**Figure S2.** Effect of the selected compounds at 25–75 μM on viability (membrane integrity) of neutrophils as indicated by propidium iodide positive [PI(+)] cells.

**Table S3.** Content of the marker compounds in the dry extracts of *G. procumbens*.

**Table S1.** Phenolic analytes detected in *G. procumbens* aerial part dry extract by UHPLC-PDA-ESI-MS<sup>3</sup>.

| Peak | Analyte                                                                                                                                                | t <sub>R</sub> (min) | UV $\lambda_{max}$ (nm) | [M-H] <sup>-</sup> m/z | MS <sup>2</sup> (% relative abundance)                                       | MS <sup>3</sup> (% relative abundance)                     |
|------|--------------------------------------------------------------------------------------------------------------------------------------------------------|----------------------|-------------------------|------------------------|------------------------------------------------------------------------------|------------------------------------------------------------|
| 1    | protocatechuic acid hexoside                                                                                                                           | 4.1                  | 259, 293                | 315                    | 225 (3); 153 (100); 107 (5)                                                  |                                                            |
| 2    | protocatechuic acid *                                                                                                                                  | 4.7                  | 259, 293                | 153                    |                                                                              |                                                            |
| 3    | protocatechuic acid hexoside                                                                                                                           | 5.8                  | 259, 293                | 315                    | 225 (1); 153 (100); 107 (2)                                                  |                                                            |
| 4    | 3-O-caffeoylquinic acid (neochlorogenic acid, NCHA) *                                                                                                  | 6.5                  | 325                     | 353                    | 191 (69); 179 (46)                                                           |                                                            |
| 5    | 3-O- <i>p</i> -coumaroylquinic acid derivative                                                                                                         | 7.0                  | 310                     | 371                    | 353 (12); 325 (100); 163 (73)                                                |                                                            |
| 6    | procyanidin A-type dimer                                                                                                                               | 9.1                  | 280                     | 575                    | 499 (73); 490 (100); 451 (18); 407 (2); 289 (35)                             |                                                            |
| 7    | procyanidin A-type dimer                                                                                                                               | 9.6                  | 280                     | 575                    | 499 (79); 490 (100); 451 (30); 411 (13); 289 (21)                            |                                                            |
| 8    | procyanidin B-type dimer                                                                                                                               | 10.0                 | 280                     | 577                    | <b>425 (100)</b> ; 407 (49); 289 (3)                                         | 407 (100); 381 (6); 341 (4); 273 (7)                       |
| 9    | procyanidin B-type dimer                                                                                                                               | 10.2                 | 280                     | 577                    | <b>425 (100)</b> ; 407 (56); 289 (18)                                        | 407 (100); 381 (2); 273 (5)                                |
| 10   | unknown compound                                                                                                                                       | 10.9                 | 280                     | 765                    | 475 (40); 443 (24); 289 (100); 245 (8)                                       |                                                            |
| 11   | 5-O-caffeoylquinic acid (chlorogenic acid, CHA) *                                                                                                      | 11.4                 | 325                     | 353                    | 191 (100); 179 (3)                                                           |                                                            |
| 12   | methyl salicylate 2-O- $\beta$ -D-glucopyranosyl-(1 $\rightarrow$ 2)- $\beta$ -D-glucopyranoside (physanguloside A) *                                  | 12.2                 | 285                     | 521 ***                | 475 (29); 443 (3); 329 (100)                                                 |                                                            |
| 13   | methyl salicylate 2-O- $\beta$ -D-glucopyranosyl-(1 $\rightarrow$ 2)-[O- $\beta$ -D-xylopyranosyl-(1 $\rightarrow$ 6)]-O- $\beta$ -D-glucopyranoside * | 12.6                 | 285                     | 653 ***                | 607 (100); 575 (11)                                                          |                                                            |
| 14   | 4-O-caffeoylquinic acid (cryptochlorogenic acid, CCHA) *                                                                                               | 12.8                 | 325                     | 353                    | 173 (100)                                                                    |                                                            |
| 15   | procyanidin B-type dimer                                                                                                                               | 14.0                 | 280                     | 577                    | <b>425 (100)</b> ; 407 (64); 289 (8)                                         | 407 (100); 381 (5); 273 (8)                                |
| 16   | procyanidin B2 (PB2) **                                                                                                                                | 15.2                 | 280                     | 577                    | <b>425 (100)</b> ; 407 (51); 289 (15)                                        | 407 (100); 273 (6)                                         |
| 17   | procyanidin B-type trimer                                                                                                                              | 15.5                 | 280                     | 865                    | 847 (17); 739 (76); <b>713 (37)</b> ; 695 (77); 577 (78); 451 (25); 287 (25) | 695 (100); 575 (47); 561 (9); 425 (28); 405 (43); 287 (15) |
| 18   | gaultherin isomer                                                                                                                                      | 15.7                 | 285                     | 491 ***                | 445 (7); 413 (10); 293 (100); 149 (4)                                        |                                                            |
| 19   | (-)-epicatechin (ECA) **                                                                                                                               | 16.5                 | 280                     | 289                    | 245 (100); 205 (23)                                                          |                                                            |
| 20   | gaultherin isomer (GT) **                                                                                                                              | 17.1                 | 285                     | 491 ***                | 445 (7); 413 (4); 293 (100); 149 (2)                                         |                                                            |
| 21   | unknown compound                                                                                                                                       | 17.7                 | 280                     | 363                    | 345 (4); 183 (100); 179 (19); 143 (7); 121 (14)                              |                                                            |
| 22   | procyanidin A-type trimer                                                                                                                              | 18.4                 | 280                     | 863                    | <b>711 (100)</b> ; 573 (34); 559 (17); 451 (47); 411 (79); 289 (100)         | 693 (100); 559 (54); 541 (16); 407 (17)                    |

Table S1. Cont.

| Peak | Analyte                                                                                                                   | t <sub>R</sub> (min) | UV $\lambda_{max}$ (nm) | [M-H] <sup>-</sup> m/z | MS <sup>2</sup> (% relative abundance)                                        | MS <sup>3</sup> (% relative abundance)                  |
|------|---------------------------------------------------------------------------------------------------------------------------|----------------------|-------------------------|------------------------|-------------------------------------------------------------------------------|---------------------------------------------------------|
| 23   | procyanidin A-type trimer (cinnamtannin B-1, CBI) **                                                                      | 20.0                 | 280                     | 863                    | <b>711 (100)</b> ; 693 (24); 573 (23); 559 (21); 451 (33); 411 (42); 289 (11) | 693 (88); 559 (100); 541 (8); 463 (3); 407 (6); 285 (1) |
| 24   | procyanidin B-type trimer (procyanidin C1) *                                                                              | 21.2                 | 280                     | 865                    | 847 (6); 739 (42); <b>713 (43)</b> ; 695 (100); 577 (80); 451 (31); 287 (59)  | 695 (100); 575 (39); 561 (89); 407 (23); 243 (9)        |
| 25   | procyanidin A-type trimer                                                                                                 | 21.6                 | 280                     | 863                    | <b>711 (100)</b> ; 573 (43); 559 (16); 451 (45); 411 (70); 289 (20)           | 693 (100); 559 (69); 541 (22); 463 (24); 407 (58)       |
| 26   | caffeoylquinic acid derivative                                                                                            | 22.0                 | 325                     | 391                    | 225 (26); 179 (100); 161 (12); 143 (7); 119 (8); 113 (5)                      |                                                         |
| 27   | procyanidin A-type dimer                                                                                                  | 22.5                 | 280                     | 575                    | 499 (100); 491 (28); 451 (8); 411 (9); 289 (37)                               |                                                         |
| 28   | procyanidin A-type dimer                                                                                                  | 23.4                 | 280                     | 575                    | 499 (57); 491 (38); 451 (11); 411 (9); 289 (95)                               |                                                         |
| 29   | procyanidin A-type trimer                                                                                                 | 24.2                 | 280                     | 863                    | <b>711 (100)</b> ; 573 (49); 559 (16); 451 (35); 411 (64); 289 (21)           | 693 (100); 559 (65); 541 (20); 463 (21); 407 (55)       |
| 30   | procyanidin A-type dimer                                                                                                  | 24.7                 | 280                     | 575                    | 499 (18); 491 (23); 451 (43); 411 (14); 289 (26)                              |                                                         |
| 31   | procyanidin A-type trimer                                                                                                 | 25.1                 | 280                     | 863                    | <b>711 (100)</b> ; 573 (68); 559 (19); 451 (6); 411 (11); 289 (11)            | 693 (100); 559 (45); 541 (28); 463 (27); 407 (50)       |
| 32   | quercetin 3-O- $\beta$ -D-xylopyranosyl-(1 $\rightarrow$ 2)- $\beta$ -D-glucuronopyranoside (wintergreenoside A, DGQ) **  | 25.5                 | 257, 356                | 609                    | 477 (2); <b>301 (100)</b>                                                     | 273 (51); 255 (22); 179 (100); 151 (69)                 |
| 33   | procyanidin A-type dimer                                                                                                  | 26.4                 | 280                     | 575                    | 499 (30); 491 (19); 451 (12); 411 (39); 289 (100)                             |                                                         |
| 34   | procyanidin A-type trimer                                                                                                 | 26.8                 | 280                     | 863                    | <b>711 (100)</b> ; 573 (60); 559 (11); 451 (35); 411 (92); 289 (39)           | 693 (29); 559 (11); 541 (12); 463 (38); 407 (21)        |
| 35   | quercetin 3-O- $\beta$ -D-galactopyranoside (hyperoside, HY) **                                                           | 27.6                 | 254, 353                | 463                    | <b>301 (100)</b>                                                              | 273 (49); 255 (19); 179 (95); 151 (75)                  |
| 36   | quercetin 3-O- $\beta$ -D-glucopyranoside (isoquercitrin, IQ) **                                                          | 28.5                 | 256, 353                | 463                    | <b>301 (100)</b>                                                              | 273 (54); 255 (22); 179 (100); 151 (76)                 |
| 37   | quercetin 3-O- $\beta$ -D-glucuronopyranoside (miquelianin, MQ) **                                                        | 29.1                 | 256, 356                | 477                    | <b>301 (100)</b>                                                              | 273 (29); 257 (19); 179 (100); 151 (58)                 |
| 38   | kaempferol 3-O- $\beta$ -D-xylopyranosyl-(1 $\rightarrow$ 2)- $\beta$ -D-glucuronopyranoside (wintergreenoside B, DKG) ** | 29.6                 | 275, 345                | 593                    | 461 (3); <b>285 (100)</b>                                                     | 267 (32); 257 (100); 241 (23); 229 (30); 151 (16)       |
| 39   | quercetin 3-O- $\alpha$ -L-arabinopyranoside (guajaverin, GV) **                                                          | 30.8                 | 258, 356                | 433                    | <b>301 (100)</b>                                                              | 273 (44); 255 (21); 179 (100); 151 (68)                 |
| 40   | kaempferol 3-O- $\beta$ -D-glucuronopyranoside (KG) **                                                                    | 33.5                 | 265, 345                | 461                    | <b>285 (100)</b>                                                              | 267 (28); 257 (100); 241 (15); 229 (45); 151 (22)       |
| 41   | quercetin (QU) *                                                                                                          | 43.7                 | 255, 364                | 301                    | 273 (41); 255 (18); 179 (100); 151 (74)                                       |                                                         |

t<sub>R</sub>, retention times; UV  $\lambda_{max}$ , absorbance maxima in PDA spectra; [M-H]<sup>-</sup>, pseudomolecular ions in MS spectra recorded in a negative ion mode; in bold – ions subjected to MS<sup>3</sup> fragmentation; \* compounds identified with authentic standards; \*\* compounds isolated during the present study; \*\*\* [M+HCOO]<sup>-</sup>. The nomenclature of caffeoylquinic acids isomers is according to IUPAC.

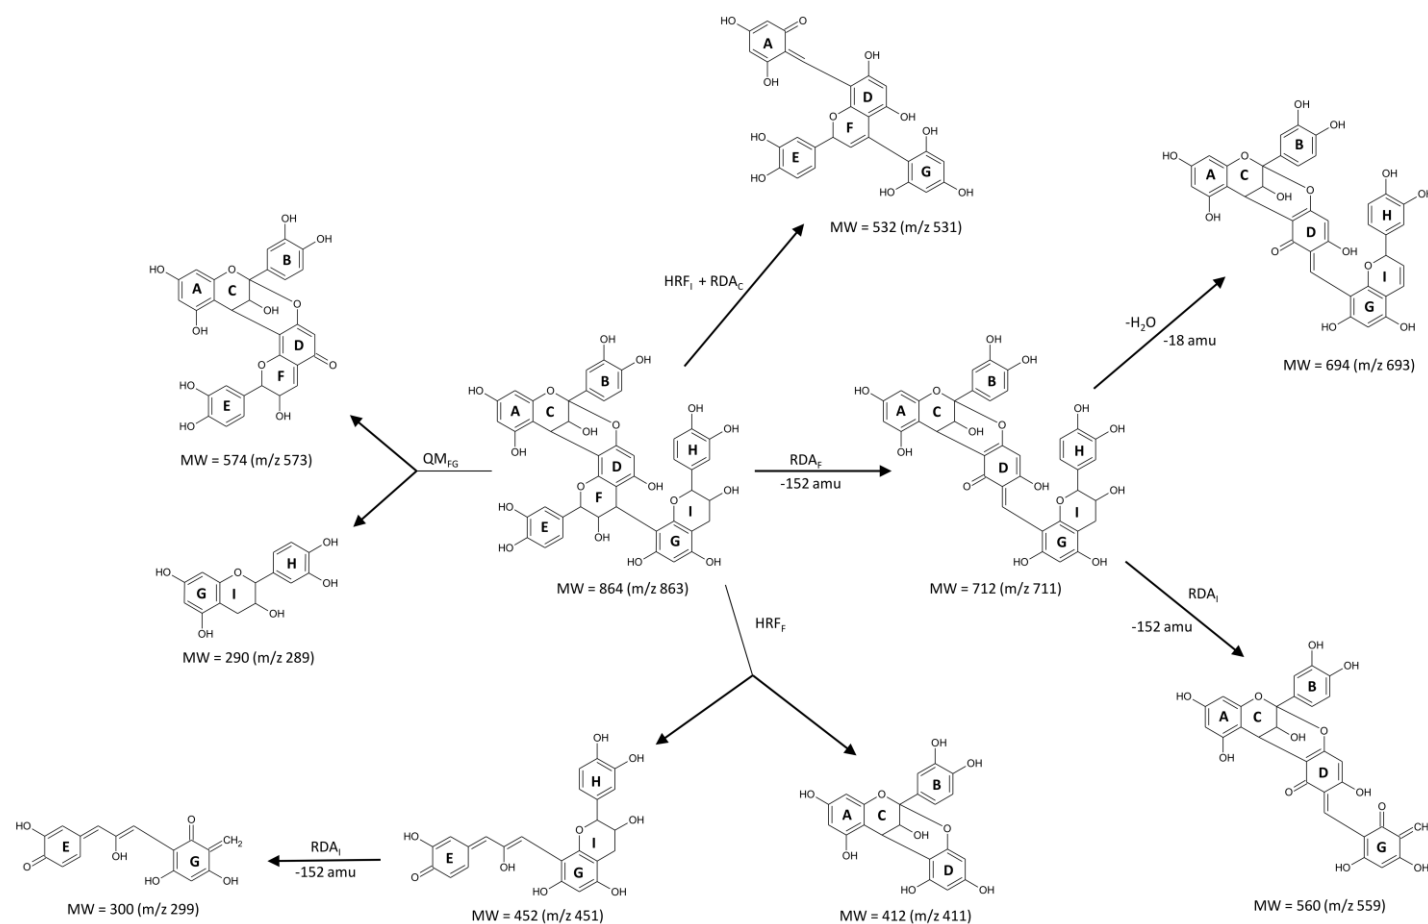

**Figure S1.** Proposed fragmentation scheme of cinnamtannin B-1 (CB1) in LC-ESI-MS<sup>3</sup>. MW, molecular weight of a ion; HRF, heterocyclic ring fission; QM, quinone methide cleavage; RDA, retro-Diels-Alder fragmentation.

**Table S2.** NMR spectral data of cinnamtannin B-1 (CB1) in methanol- $d_4$  (600 MHz for  $^1\text{H}$  NMR and 150.9 MHz for  $^{13}\text{C}$  NMR) <sup>a</sup>.

| Ring | Pos. <sup>b</sup> | $\delta_{\text{H}}$                           | $\delta_{\text{C}}$ |
|------|-------------------|-----------------------------------------------|---------------------|
| C    | 2                 |                                               | 101.2               |
|      | 3                 | 3.34 (1H, <i>d</i> , $J=3.4$ )                | 68.2                |
|      | 4                 | 4.19 (1H, <i>d</i> , $J=3.4$ )                | 29.9                |
| A    | 5                 |                                               | 157.8               |
|      | 6                 | 6.01 (1H, <i>d</i> , $J=2.3$ )                | 99.4                |
|      | 7                 |                                               | 158.9               |
|      | 8                 | 6.06 (1H, <i>d</i> , $J=2.3$ )                | 97.6                |
|      | 9                 |                                               | 155.2               |
|      | 10                |                                               | 105.9               |
| B    | 1'                |                                               | 133.5               |
|      | 2'                | 7.08 (1H, <i>d</i> , $J=1.9$ )                | 117.2               |
|      | 3'                |                                               | 146.8               |
|      | 4'                |                                               | 146.9               |
|      | 5'                | 6.88 (1H, <i>d</i> , $J=8.3$ )                | 117.1               |
|      | 6'                | 6.90 (1H, <i>dd</i> , $J_1=2.3$ , $J_2=8.3$ ) | 120.9               |
| F    | 2                 | 5.74 (1H, <i>s</i> )                          | 79.9                |
|      | 3                 | 4.17 (1H, <i>br s</i> )                       | 73.6                |
|      | 4                 | 4.6 (1H, <i>br s</i> )                        | 39.3                |
| D    | 5                 |                                               | 156.8               |
|      | 6                 | 5.85 (1H, <i>s</i> )                          | 97.2                |
|      | 7                 |                                               | 152.1               |
|      | 8                 |                                               | 107.5               |
|      | 9                 |                                               | 152.8               |
|      | 10                |                                               | 107.8               |
| E    | 1'                |                                               | 132.8               |
|      | 2'                | 7.35 (1H, <i>d</i> , $J=1.5$ )                | 117.8               |
|      | 3'                |                                               | 147.3               |
|      | 4'                |                                               | 147.6               |
|      | 5'                | 6.83 (1H, <i>d</i> , $J=8.3$ )                | 116.8               |
|      | 6'                | 7.22 (1H, <i>dd</i> , $J_1=1.5$ , $J_2=8.3$ ) | 122.4               |
| I    | 2                 | 4.43 (1H, <i>s</i> )                          | 81.4                |
|      | 3                 | 3.91 (1H, <i>br s</i> )                       | 68.6                |
|      | 4                 | 2.88 (2H, <i>m</i> )                          | 30.9                |
| G    | 5                 |                                               | 157.1               |
|      | 6                 | 6.15 (1H, <i>s</i> )                          | 97.6                |
|      | 7                 |                                               | 156.6               |
|      | 8                 |                                               | 109.9               |
|      | 9                 |                                               | 156.8               |
|      | 10                |                                               | 100.9               |
| H    | 1'                |                                               | 134.2               |
|      | 2'                | 6.86 (1H, <i>d</i> , $J=1.5$ )                | 116.4               |
|      | 3'                |                                               | 146.4               |
|      | 4'                |                                               | 146.5               |
|      | 5'                | 6.79 (1H, <i>d</i> , $J=8.3$ )                | 116.5               |
|      | 6'                | 6.76 (1H, <i>dd</i> , $J_1=1.5$ , $J_2=8.3$ ) | 120.6               |

<sup>a</sup> Data acquired with TMS as the internal standard,  $\delta$  in ppm. Multiplicities and coupling constants ( $J$ , in Hz) are given in parentheses. Assignments confirmed by  $^1\text{H}$ - $^1\text{H}$  COSY, HMQC, HMBC and ROESY experiments. <sup>b</sup> For trivial atom numbering see chemical formula of CB1 (Fig. 2).

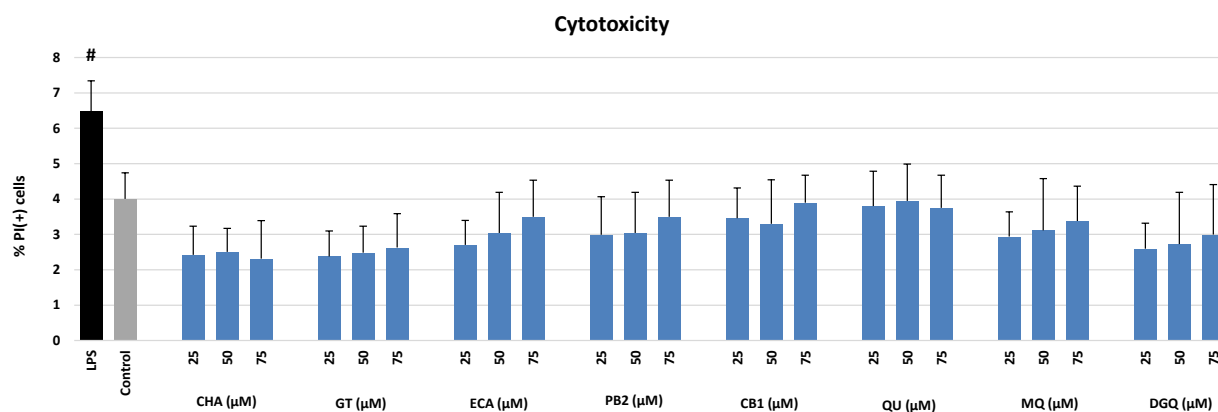

**Figure S2.** Effect of the selected compounds at 25–75 µM on viability (membrane integrity) of neutrophils as indicated by propidium iodide positive [PI(+)] cells. Data expressed as means ± SD of three independent experiments performed with cells isolated from five independent donors. Statistical significance: # $p < 0.05$  compared to the non-stimulated control. Analytes: QU, quercetin; MQ, miquelianin; DGQ, wintergreenoside A; ECA, (–)-epicatechin; PB2, procyanidin B2; CB1, cinnamtannin B-1; CHA, chlorogenic acid; GT, gaultherin.

**Table S3.** Content of the marker compounds in the dry extracts of *G. procumbens*.

| Analyte | Content (mg/g dw) <sup>a</sup> |                           |                           |                           |                           |                            |                            |                           |
|---------|--------------------------------|---------------------------|---------------------------|---------------------------|---------------------------|----------------------------|----------------------------|---------------------------|
|         | ME-AP                          | ME-L                      | ME-S                      | MED-AP                    | DEF-AP                    | EAF-AP                     | BF-AP                      | WF-AP                     |
| NCHA    | 3.68 ± 0.13 <sup>D</sup>       | 4.24 ± 0.08 <sup>E</sup>  | 0.96 ± 0.04 <sup>A</sup>  | 2.48 ± 0.15 <sup>C</sup>  | 1.67 ± 0.06 <sup>B</sup>  | 5.68 ± 0.22 <sup>F</sup>   | 6.47 ± 0.06 <sup>G</sup>   | 2.34 ± 0.15 <sup>C</sup>  |
| CHA     | 1.25 ± 0.09 <sup>C</sup>       | 1.68 ± 0.11 <sup>D</sup>  | 0.96 ± 0.05 <sup>B</sup>  | 1.67 ± 0.10 <sup>D</sup>  | 2.46 ± 0.13 <sup>F</sup>  | 2.72 ± 0.13 <sup>G</sup>   | 2.04 ± 0.08 <sup>E</sup>   | 0.41 ± 0.01 <sup>A</sup>  |
| CCHA    | 0.65 ± 0.03 <sup>A</sup>       | 0.88 ± 0.10 <sup>B</sup>  | <i>nd</i>                 | 1.95 ± 0.11 <sup>D</sup>  | 0.81 ± 0.05 <sup>B</sup>  | 3.78 ± 0.22 <sup>E</sup>   | 3.56 ± 0.20 <sup>E</sup>   | 1.24 ± 0.03 <sup>C</sup>  |
| PB2     | 14.25 ± 0.45 <sup>E</sup>      | 13.15 ± 0.37 <sup>D</sup> | 17.22 ± 0.19 <sup>D</sup> | 13.46 ± 0.25 <sup>D</sup> | 6.12 ± 0.55 <sup>B</sup>  | 35.05 ± 0.65 <sup>F</sup>  | 8.36 ± 0.21 <sup>C</sup>   | 2.10 ± 0.07 <sup>A</sup>  |
| ECA     | 12.47 ± 0.67 <sup>C</sup>      | 9.07 ± 0.29 <sup>B</sup>  | 24.35 ± 0.93 <sup>D</sup> | 12.31 ± 0.16 <sup>C</sup> | 0.31 ± 0.07 <sup>A</sup>  | 79.73 ± 1.58 <sup>E</sup>  | <i>nd</i>                  | <i>nd</i>                 |
| GT      | 96.51 ± 0.80 <sup>F</sup>      | 98.41 ± 0.31 <sup>E</sup> | 93.76 ± 0.81 <sup>D</sup> | 75.68 ± 0.80 <sup>B</sup> | 21.37 ± 1.11 <sup>A</sup> | 30.25 ± 1.47 <sup>C</sup>  | 127.69 ± 4.06 <sup>G</sup> | 27.81 ± 1.99 <sup>B</sup> |
| CB1     | 19.84 ± 0.22 <sup>C</sup>      | 18.61 ± 0.28 <sup>B</sup> | 25.11 ± 0.52 <sup>D</sup> | 14.42 ± 0.22 <sup>A</sup> | <i>nd</i>                 | 154.57 ± 4.52 <sup>E</sup> | 15.51 ± 0.78 <sup>A</sup>  | <i>nd</i>                 |
| DGQ     | 5.13 ± 0.38 <sup>E</sup>       | 7.26 ± 0.24 <sup>F</sup>  | 2.16 ± 0.14 <sup>C</sup>  | 3.90 ± 0.38 <sup>D</sup>  | 1.02 ± 0.04 <sup>B</sup>  | 0.40 ± 0.01 <sup>A</sup>   | 5.05 ± 0.09 <sup>E</sup>   | 10.65 ± 0.52 <sup>G</sup> |
| HY      | 3.24 ± 0.25 <sup>B</sup>       | 5.01 ± 0.16 <sup>D</sup>  | 1.04 ± 0.03 <sup>A</sup>  | 5.34 ± 0.25 <sup>D</sup>  | 4.30 ± 0.17 <sup>C</sup>  | 30.04 ± 1.69 <sup>F</sup>  | 9.88 ± 0.08 <sup>E</sup>   | <i>nd</i>                 |
| MQ      | 27.75 ± 0.78 <sup>D</sup>      | 32.14 ± 0.69 <sup>E</sup> | 17.54 ± 0.57 <sup>B</sup> | 30.38 ± 0.78 <sup>C</sup> | 9.72 ± 0.55 <sup>A</sup>  | 36.90 ± 1.34 <sup>F</sup>  | 42.74 ± 0.24 <sup>G</sup>  | 22.84 ± 0.88 <sup>C</sup> |
| QU      | 0.19 ± 0.01 <sup>C</sup>       | 0.22 ± 0.01 <sup>C</sup>  | 0.1 ± 0.01 <sup>B</sup>   | 0.48 ± 0.01 <sup>D</sup>  | 8.68 ± 0.46 <sup>F</sup>  | 5.36 ± 0.18 <sup>E</sup>   | 7.74 ± 0.29 <sup>G</sup>   | 0.07 ± 0.01 <sup>A</sup>  |
| Total   | 184.96                         | 190.67                    | 181.04                    | 162.07                    | 56.46                     | 384.48                     | 229.04                     | 67.46                     |

Analytes: QU, quercetin; MQ, miquelianin; HY, hyperoside; DGQ, wintergreenoside A; ECA, (–)-epicatechin; PB2, procyanidin B2; CB1, cinnamtannin B-1; NCHA, neochlorogenic acid; CHA, chlorogenic acid; CCHA, cryptochlorogenic acid; GT, gaultherin. Extracts: methanol-water (75:25, *v/v*) extracts (ME) of the aerial parts (ME-AP), leaves (ME-L), and stems (ME-S); deffated methanol-water (75:25, *v/v*) extract of aerial parts (MED-AP), and its fractions: DEF-AP (diethyl ether fraction), EAF-AP (ethyl acetate fraction), BF-AP (*n*-butanol fraction), and WF-AP (water fraction). All data expressed as mean values ± SD (*n* = 3 × 3 × 1); <sup>a</sup> dry weight of the plant extract; different superscripts (A–G) indicate significant differences in the mean value at  $\alpha = 0.05$ ; *nd* – not detected.
